# Supplementary material
Source: publisher figshare collection journal article supplement (https://sage.figshare.com/ndownloader/files/21208191)

Supplementary Figure 1– Funnel Plot of Event Rate of Myocarditis

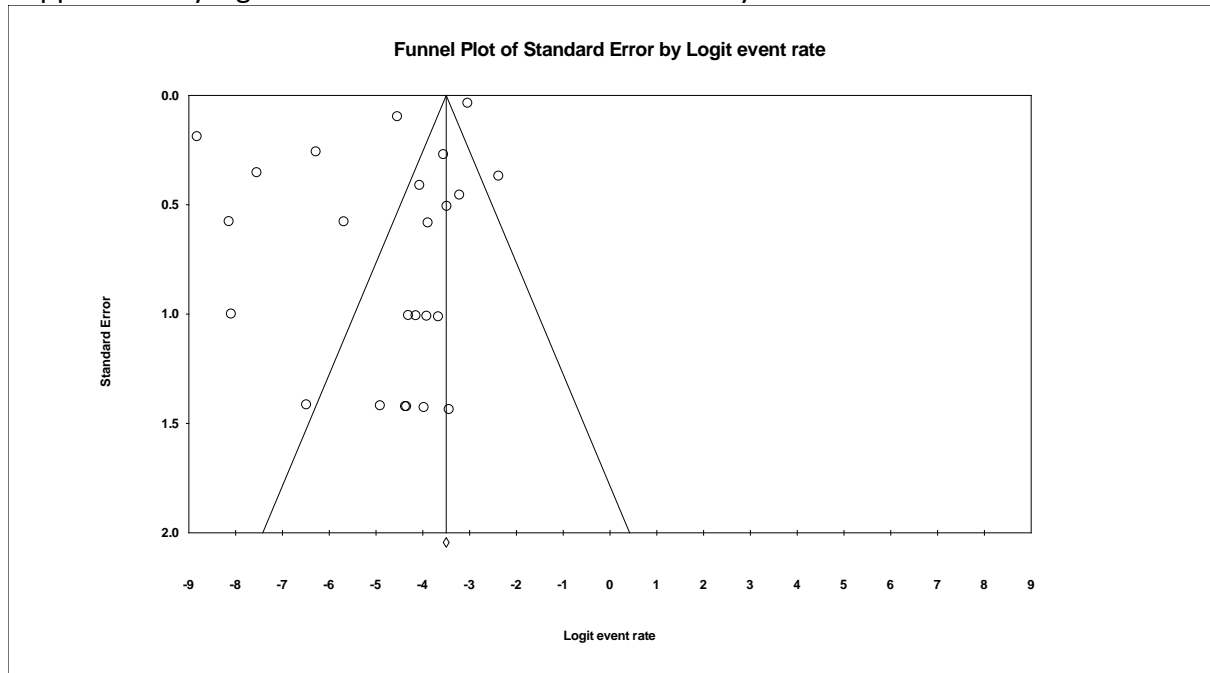

Supplementary Figure 2 – Funnel Plot of Event Rate of Cardiomyopathy

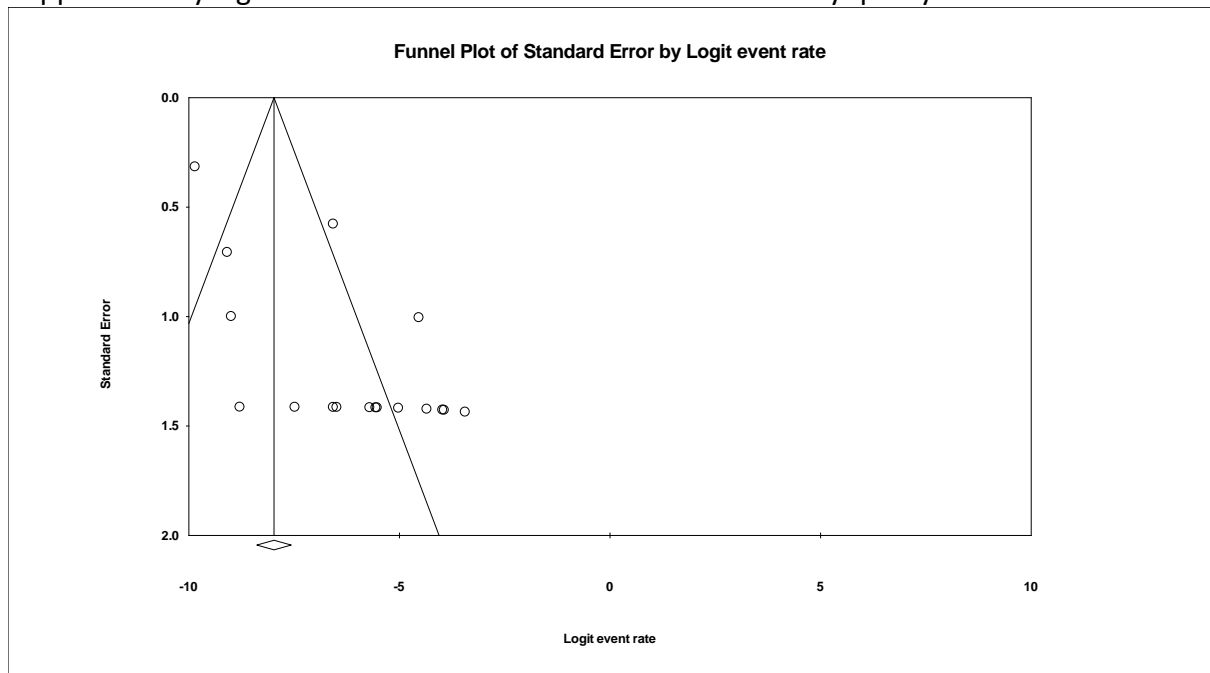

Supplement: Supplementary file 1 [file 21208191]
